# Supplementary material
Source: publisher figshare collection journal article supplement (https://karger.figshare.com/articles/dataset/_/8863529)
Supplement: Supplementary file 3 [file 1]

Table 1 Baseline demographic, clinical and pain characteristics <sup>1)</sup>

|                                                              | Sham Infusion –<br>placebo conditioning<br>(n=17) | Sham Infusion -<br>Expectancy<br>(n=21) | Sham Infusion –<br>nocebo conditioning<br>(n=21) | Natural History<br>(n=14) |
|--------------------------------------------------------------|---------------------------------------------------|-----------------------------------------|--------------------------------------------------|---------------------------|
| <b>Demographic characteristics</b>                           |                                                   |                                         |                                                  |                           |
| <i>Age (years)</i>                                           | 47.29 (12.17)                                     | 55.48 (10.72)                           | 49.35 ( 12.91)                                   | 48.07 (8.49)              |
| <i>Sex: Male</i>                                             | 10 (13.70%)                                       | 5 (6.85%)                               | 11 (15.07%)                                      | 6 (8.22%)                 |
| <i>Sex: Female</i>                                           | 7 (9.59%)                                         | 16 (21.92%)                             | 10 (13.70%)                                      | 8 (10.96%)                |
| <b>Clinical characteristics</b>                              |                                                   |                                         |                                                  |                           |
| <i>Back pain duration in total<br/>(months)</i>              | 121.12 (126.32)                                   | 222.38 (143.33)                         | 164.38 (124.51)                                  | 111.86 (92.05)            |
| <i>Back pain duration of current<br/>intensity (months)</i>  | 2.94 (0.24)                                       | 2.95 (0.22)                             | 2.95 (0.21)                                      | 2.93 (0.26)               |
| <i>Disability through by back pain</i>                       | 4.24 (2.63)                                       | 4.81 (1.43)                             | 5.45 (1.93)                                      | 5.00 (1.71)               |
| <i>Back pain intensity (average last<br/>3 months)</i>       | 5.65 (1.80)                                       | 6.29 (1.34)                             | 6.00 (1.48)                                      | 5.43 (1.74)               |
| <i>Back pain intensity strongest<br/>pain last 3 months)</i> | 7.94 (1.14)                                       | 8.05 (1.24)                             | 7.90 (1.25)                                      | 8.14 (0.86)               |
| <b>Pain characteristics (Milliampere mA)</b>                 |                                                   |                                         |                                                  |                           |
| <i>Day 1 Detection threshold</i>                             | 0.48 (0.39)                                       | 0.62 (0.77)                             | 0.30 (0.14)                                      | 0.37 (0.16)               |
| <i>Day 1 &amp; 8 Pain stimulus baseline</i>                  | 1.90 (1.90)                                       | 1.74 (1.23)                             | 1.50 (1.70)                                      | 1.70 (1.51)               |
| <i>Day 1 Pain threshold</i>                                  | 2.32 (1.79)                                       | 2.00 (1.38)                             | 2.04 (2.14)                                      | 2.74 (2.44)               |
| <i>Day 1 Stimulus, condi.<sup>2)</sup></i>                   | 0.62 (0.57)                                       | Baseline stimulus                       | 3.14 (2.36)                                      | Baseline stimulus         |

<sup>1)</sup> Data are mean values (SD), n (%) or n. None of the variables revealed significant differences between groups.

<sup>2)</sup> Pain stimulus, condi. = Conditional pain stimulus during phase of conditioning; individual pain stimuli were reduced to detection threshold level in Placebo conditioning and to Pain threshold level in nocebo conditioning. The non-conditional group and the NH received their original pain stimulus (baseline).
