# Supplementary material
Source: publisher figshare collection journal article supplement (https://karger.figshare.com/articles/dataset/_/8863529)
Supplement: Supplementary file 6 [file 1]

Table 4

Patients' acute pain ratings: Difference values and standard deviations of the placebo effect relating to the different instructions and conditioning conditions

| Experimental manipulation       |              |       | day 1                                                                |      | day 8                                                                            |      |                                                                                  |      |                                                          |       |                 |
|---------------------------------|--------------|-------|----------------------------------------------------------------------|------|----------------------------------------------------------------------------------|------|----------------------------------------------------------------------------------|------|----------------------------------------------------------|-------|-----------------|
| Instruction                     | Conditioning | Group | Difference<br>1 <sup>st</sup> baseline –<br>conditioning/<br>without |      | Difference<br>1 <sup>st</sup> baseline -<br>1 <sup>st</sup> result <sup>1)</sup> |      | Difference<br>1 <sup>st</sup> baseline -<br>2 <sup>st</sup> result <sup>2)</sup> |      | repeated measures<br>Difference day 1 - Difference day 8 |       |                 |
|                                 |              |       | M                                                                    | SD   | M                                                                                | SD   | M                                                                                | SD   | F <sup>3)</sup>                                          | P     | d <sup>4)</sup> |
| Infusion                        | Placebo      | 1     | -5.76                                                                | 1.10 | -1.90                                                                            | 2.06 | -2.77                                                                            | 2.32 | (1,16) 1.01                                              | = .32 | .06             |
|                                 | without      | 2     | -1.67                                                                | 1.50 | -2.22                                                                            | 1.70 | -1.11                                                                            | 2.32 | (1,20) 5.16                                              | < .05 | .20             |
|                                 | Nocebo       | 3     | 1.53                                                                 | 0.96 | -1.64                                                                            | 2.12 | -1.57                                                                            | 2.95 | (1,20) 0.02                                              | = .88 | .00             |
| Natural History                 | without      | 4     | -0.52                                                                | 0.96 | -1.42                                                                            | 1.24 | -0.64                                                                            | 2.61 | (1,13) 0.88                                              | = .36 | .06             |
| Differences between groups/time |              |       | F <sub>(3,69)</sub> = 124.65<br>p < .001                             |      | F <sub>(3,69)</sub> = .61<br>p = .60                                             |      | F <sub>(3,69)</sub> = 2.06<br>p = .11                                            |      |                                                          |       |                 |

<sup>1)</sup> Infusion had occurred/ or waiting time by Natural History followed by conditioning or without conditioning.

<sup>3)</sup> Baseline. Patients' ratings of experimental pain from 0 no pain to 14 strongest pain.

<sup>3)</sup> Analysis of variance repeated measures: Difference values between day 1- and day 8.

<sup>4)</sup> Cohens d: Repeated measurements 2 time points.
