# Supplementary material
Source: publisher figshare collection journal article supplement (https://karger.figshare.com/articles/dataset/_/8863529)
Supplement: Supplementary file 7 [file 1]

Archive with 11 entries (11 files):
- PPS_201812003_1_10_Supplement_3.docx
- PPS_201812003_1_9_Supplement_2.docx
- PPS_201812003_1_8_Supplement_1_PDF.PDF
- PPS_201812003_1_8_Supplement_1.docx
- PPS_201812003_1_13_Supplement_6_PDF.PDF
- PPS_201812003_1_13_Supplement_6.docx
- PPS_201812003_1_12_Supplement_5_PDF.PDF
- PPS_201812003_1_12_Supplement_5.docx
- PPS_201812003_1_11_Supplement_4.pdf
- PPS_201812003_1_10_Supplement_3_PDF.PDF
- PPS_201812003_1_9_Supplement_2_PDF.PDF
