# Supplementary material
Source: publisher figshare collection journal article supplement (https://karger.figshare.com/articles/dataset/_/8863529)
Supplement: Supplementary file 7 [file 1 › PPS_201812003_1_10_Supplement_3.docx]

*Table 4*

*Patients' acute pain ratings: Difference values and standard deviations of the placebo effect relating to the different instructions and conditioning conditions*

**Experimental manipulation day 1**  **day 8**

|  |  |  | **Difference** 1st baseline – conditioning/ without | **Difference** 1st baseline - 1st result1) | | | **Difference** 1st baseline - 2st result2) | |  | **repeated measures**  Difference day 1- Difference day 8 | |
| --- | --- | --- | --- | --- | --- | --- | --- | --- | --- | --- | --- |
| **Instruction** | **Conditioning** | **Group** | **M SD** | **M** | **SD** | | **M** | **SD** | **F3)** | | **P d4)** |
| Infusion | Placebo | 1 | **-5.76** 1.10 | **-1.90** | *2.06* | | **-2.77** | *2.32* | (1,16) 1.01 | | =.32 .06 |
| without | 2 | **-1.67** 1.50 | **-2.22** | *1.70* | | **-1.11** | *2.32* | (1,20) 5.16 | | < .05 .20 |
| Nocebo | 3 | **1.53** 0.96 | **-1.64** | *2.12* | | **-1.57** | *2.95* | (1,20) 0.02 | | = .88 .00 |
| Natural History | without | 4 | **-0.52** 0.96 | **-1.42** | *1.24* | | **-0.64** | *2.61* | (1,13) 0.88 | | = .36 .06 |
| Differences between groups/time | | | F (3,69)= 124.65  p <.001 | F (3,69)= .61  p = .60 | | F (3,69)= 2.06  p = .11 | | | | | |

1) Infusion had occurred/ or waiting time by Natural History followed by conditioning or without conditioning.

3) Baseline. Patients' ratings of experimental pain from 0 no pain to 14 strongest pain.

3)Analysis of variance repeated measures: Difference values between day 1- and day 8.

4) Cohens d: Repeated measurements 2 time points.
