# Supplementary material
Source: publisher figshare collection journal article supplement (https://karger.figshare.com/articles/dataset/_/8863529)
Supplement: Supplementary file 7 [file 1 › PPS_201812003_1_13_Supplement_6.docx]

**Supplement 1 CONSORT Flow Diagram**

## Enrollment

## Analysis

## Allocation

Assessed for eligibility (n= 154)

Excluded (n= 58)

- pilot patient (n= 1)
- not meeting inclusion criteria (diagnoses; n= 20)
- not meeting inclusion criteria (back pain < 3; n= 8)
- declined to participate (n=29)

Allocated to NH
(n= 24)

- Received allocated waiting time: n= 17
- Did not receive allocated waiting time
  n= 1 failed to appear to the experiment
  n= 3 declined after allocation to the NH
  n= 3 declined after day 1 of the experiment

N= 17

Allocated to PLAC
(n= 24)

- Received allocated intervention: n= 20
- Did not receive allocated intervention / dropped out
  n=1 due to personal reason n= 2 due to side-effects after 1st infusion

n= 1 due to intolerance to the electrical impulse

N= 20

Analysed (n= 17)

- Excluded from analysis (n= 3 due to back pain rating at assessment < 3)

Analysed (n= 21)

 Excluded from analysis
(n= 3 due to back pain rating at assessment < 3)

Analysed (n= 14)

 Excluded from analysis
(n= 3 due to back pain rating at assessment < 3)

Analysed (n= 21)

 Excluded from analysis
(n= 3 due to back pain rating at assessment < 3)

Allocated to NOC
(n= 24)

- Received allocated intervention: n= 24
- Did not receive allocated intervention
   n= 0

N= 24

Allocated to EXP
(n= 24)

- Received allocated
  intervention: n= 24
- Did not receive allocated intervention
   n= 0

N= 24

Randomized (n=96)
