# Supplementary material
Source: publisher figshare collection journal article supplement (https://karger.figshare.com/articles/dataset/_/8863529)

Placebo effect on **clinical** back pain  
"Infusion - nocebo conditioning", N=21

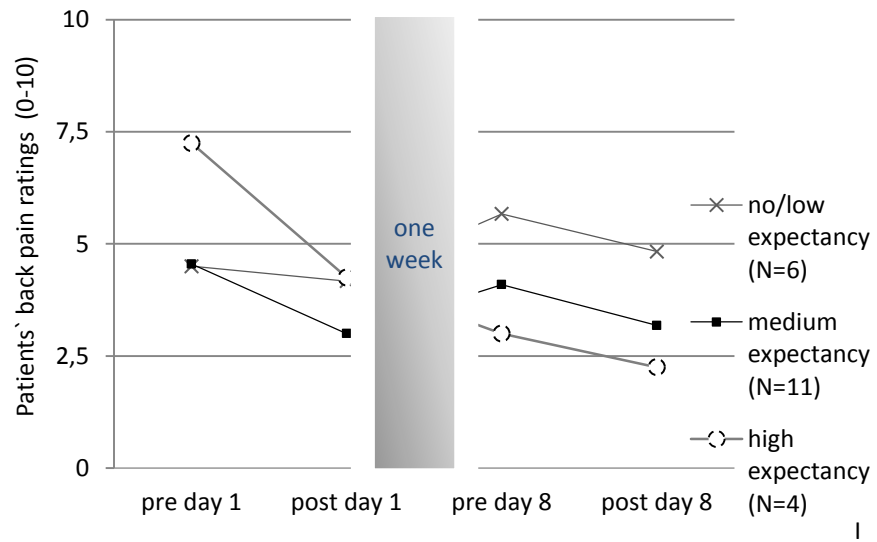

Supplement: Supplementary file 2 [file 1]

## Supplement 1 CONSORT Flow Diagram

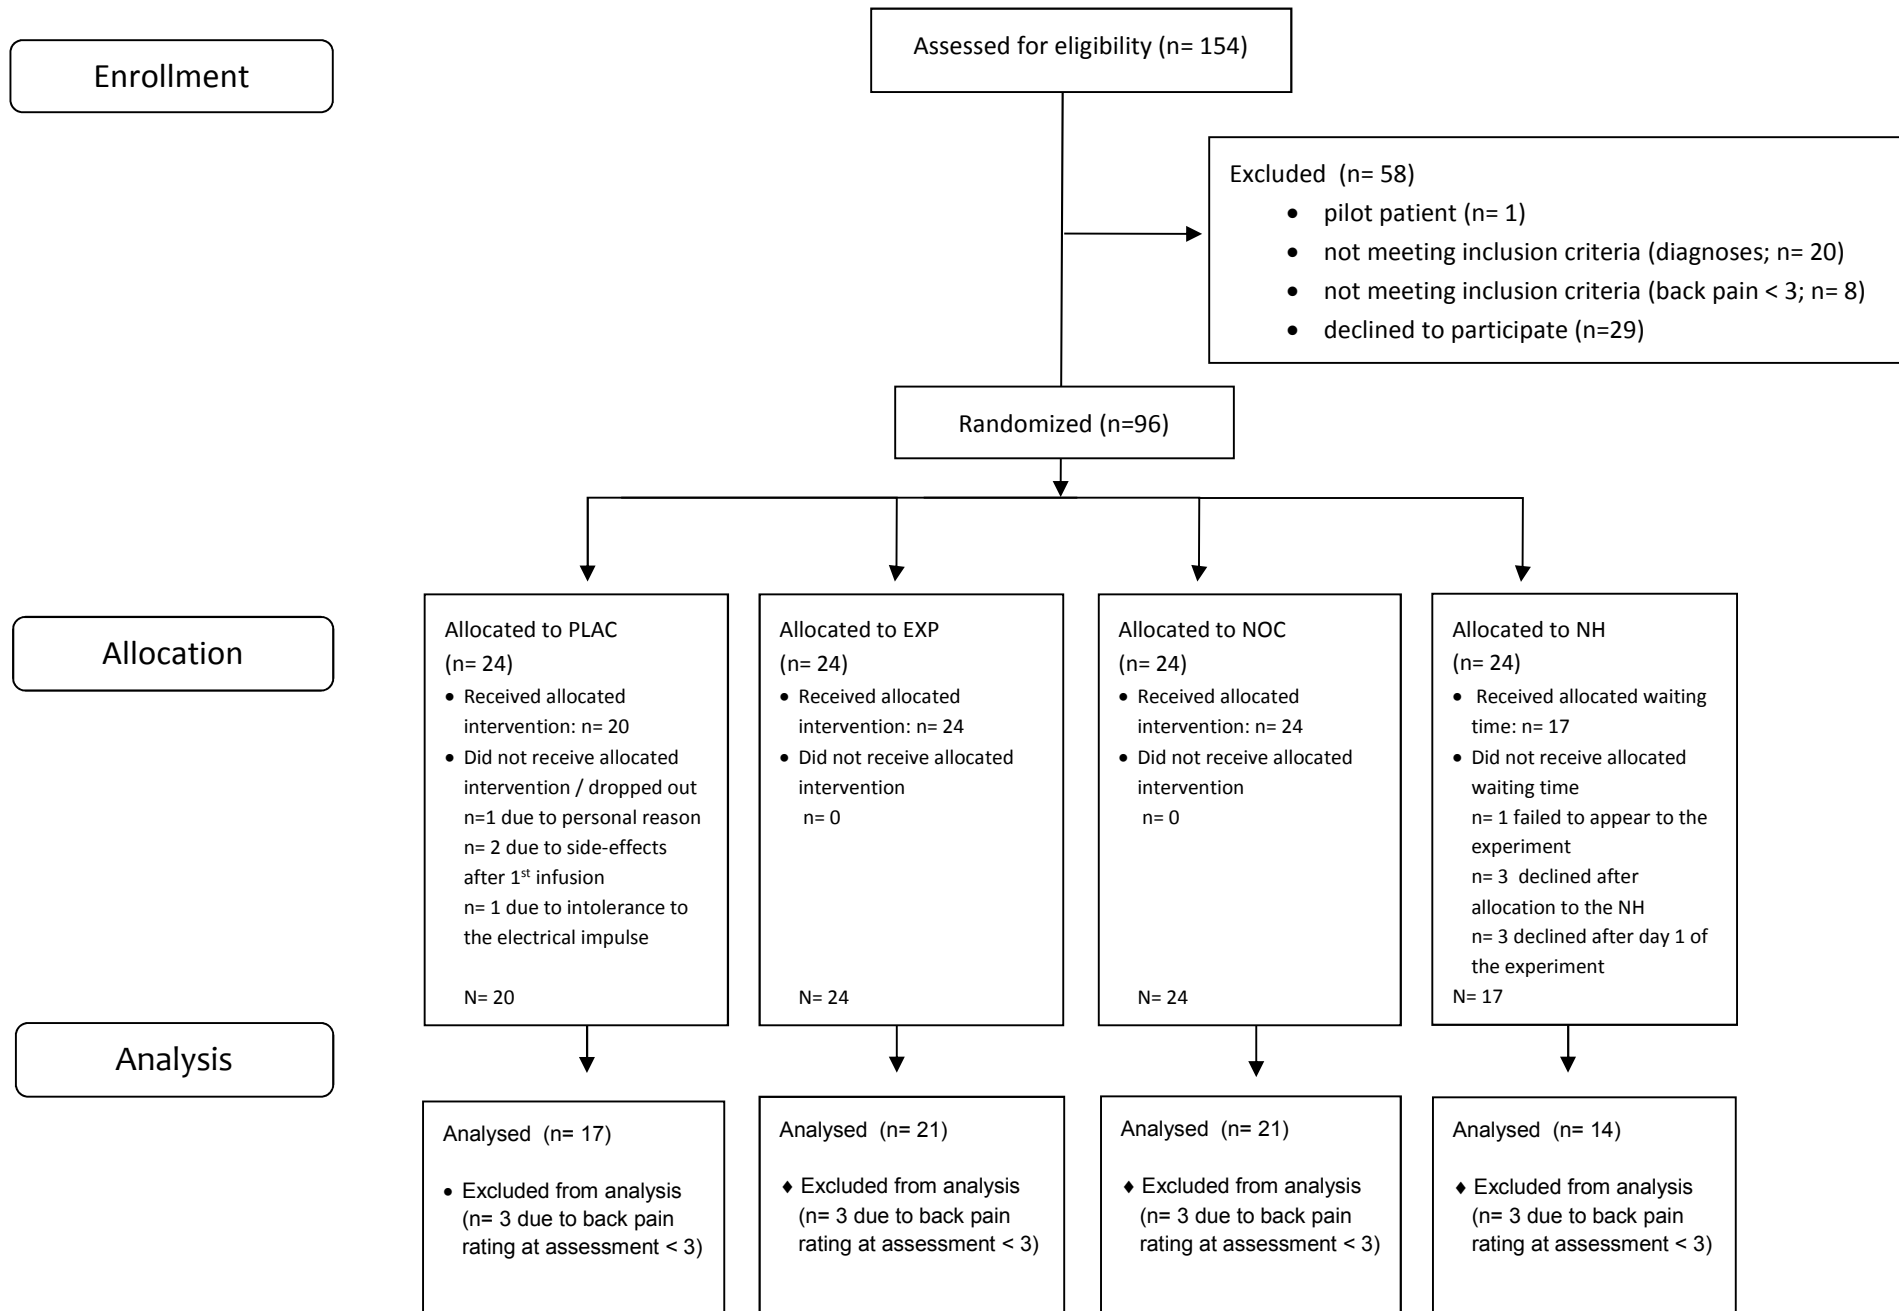

Supplement: Supplementary file 5 [file 1]
